# Supplementary material
Source: publisher figshare collection journal article supplement (https://plos.figshare.com/articles/dataset/_/681126)
Supplement: Supplementary file [file 1]

Table S1

| Residue | Chain | Charge | Residue | Chain | Charge | Residue | Chain | Charge |
|---------|-------|--------|---------|-------|--------|---------|-------|--------|
| MET002  | A     | 1      | MET002  | B     | 1      | MET002  | C     | 1      |
| ILE003  | A     | 0      | ILE003  | B     | 0      | ILE003  | C     | 0      |
| ARG004  | A     | 1      | ARG004  | B     | 1      | ARG004  | C     | 1      |
| GLY005  | A     | 0      | GLY005  | B     | 0      | GLY005  | C     | 0      |
| ILE006  | A     | 0      | ILE006  | B     | 0      | ILE006  | C     | 0      |
| ARG007  | A     | 1      | ARG007  | B     | 1      | ARG007  | C     | 1      |
| GLY008  | A     | 0      | GLY008  | B     | 0      | GLY008  | C     | 0      |
| ALA009  | A     | 0      | ALA009  | B     | 0      | ALA009  | C     | 0      |
| THR010  | A     | 0      | THR010  | B     | 0      | THR010  | C     | 0      |
| THR011  | A     | 0      | THR011  | B     | 0      | THR011  | C     | 0      |
| VAL012  | A     | 0      | VAL012  | B     | 0      | VAL012  | C     | 0      |
| GLU013  | A     | -1     | GLU013  | B     | -1     | GLU013  | C     | -1     |
| ARG014  | A     | 1      | ARG014  | B     | 1      | ARG014  | C     | 1      |
| ASP015  | A     | -1     | ASP015  | B     | -1     | ASP015  | C     | -1     |
| THR016  | A     | 0      | THR016  | B     | 0      | THR016  | C     | 0      |
| GLU017  | A     | -1     | GLU017  | B     | -1     | GLU017  | C     | -1     |
| GLU018  | A     | -1     | GLU018  | B     | -1     | GLU018  | C     | -1     |
| GLU019  | A     | -1     | GLU019  | B     | -1     | GLU019  | C     | -1     |
| ILE020  | A     | 0      | ILE020  | B     | 0      | ILE020  | C     | 0      |
| LEU021  | A     | 0      | LEU021  | B     | 0      | LEU021  | C     | 0      |
| GLN022  | A     | 0      | GLN022  | B     | 0      | GLN022  | C     | 0      |
| LYS023  | A     | 1      | LYS023  | B     | 1      | LYS023  | C     | 1      |
| THR024  | A     | 0      | THR024  | B     | 0      | THR024  | C     | 0      |
| LYS025  | A     | 1      | LYS025  | B     | 1      | LYS025  | C     | 1      |
| GLN026  | A     | 0      | GLN026  | B     | 0      | GLN026  | C     | 0      |
| LEU027  | A     | 0      | LEU027  | B     | 0      | LEU027  | C     | 0      |
| LEU028  | A     | 0      | LEU028  | B     | 0      | LEU028  | C     | 0      |
| GLU029  | A     | -1     | GLU029  | B     | -1     | GLU029  | C     | -1     |
| LYS030  | A     | 1      | LYS030  | B     | 1      | LYS030  | C     | 1      |
| ILE031  | A     | 0      | ILE031  | B     | 0      | ILE031  | C     | 0      |
| ILE032  | A     | 0      | ILE032  | B     | 0      | ILE032  | C     | 0      |
| GLU033  | A     | -1     | GLU033  | B     | -1     | GLU033  | C     | -1     |
| GLU034  | A     | -1     | GLU034  | B     | -1     | GLU034  | C     | -1     |
| ASN035  | A     | 0      | ASN035  | B     | 0      | ASN035  | C     | 0      |
| HIS036  | A     | 0      | HIS036  | B     | 0      | HIS036  | C     | 0      |
| THR037  | A     | 0      | THR037  | B     | 0      | THR037  | C     | 0      |
| LYS038  | A     | 1      | LYS038  | B     | 1      | LYS038  | C     | 1      |
| PRO039  | A     | 0      | PRO039  | B     | 0      | PRO039  | C     | 0      |
| GLU040  | A     | -1     | GLU040  | B     | -1     | GLU040  | C     | -1     |
| ASP041  | A     | -1     | ASP041  | B     | -1     | ASP041  | C     | -1     |
| VAL042  | A     | 0      | VAL042  | B     | 0      | VAL042  | C     | 0      |
| VAL043  | A     | 0      | VAL043  | B     | 0      | VAL043  | C     | 0      |
| GLN044  | A     | 0      | GLN044  | B     | 0      | GLN044  | C     | 0      |
| MET045  | A     | 0      | MET045  | B     | 0      | MET045  | C     | 0      |
| LEU046  | A     | 0      | LEU046  | B     | 0      | LEU046  | C     | 0      |

Continued on next page

**Table S1 – continued from previous page**

| Residue | Chain | Charge | Residue | Chain | Charge | Residue | Chain | Charge |
|---------|-------|--------|---------|-------|--------|---------|-------|--------|
| LEU047  | A     | 0      | LEU047  | B     | 0      | LEU047  | C     | 0      |
| SER048  | A     | 0      | SER048  | B     | 0      | SER048  | C     | 0      |
| ALA049  | A     | 0      | ALA049  | B     | 0      | ALA049  | C     | 0      |
| THR050  | A     | 0      | THR050  | B     | 0      | THR050  | C     | 0      |
| PRO051  | A     | 0      | PRO051  | B     | 0      | PRO051  | C     | 0      |
| ASP052  | A     | -1     | ASP052  | B     | -1     | ASP052  | C     | -1     |
| LEU053  | A     | 0      | LEU053  | B     | 0      | LEU053  | C     | 0      |
| HIS054  | A     | 0      | HIS054  | B     | 0      | HIS054  | C     | 0      |
| ALA055  | A     | 0      | ALA055  | B     | 0      | ALA055  | C     | 0      |
| VAL056  | A     | 0      | VAL056  | B     | 0      | VAL056  | C     | 0      |
| PHE057  | A     | 0      | PHE057  | B     | 0      | PHE057  | C     | 0      |
| PRO058  | A     | 0      | PRO058  | B     | 0      | PRO058  | C     | 0      |
| ALA059  | A     | 0      | ALA059  | B     | 0      | ALA059  | C     | 0      |
| LYS060  | A     | 1      | LYS060  | B     | 1      | LYS060  | C     | 1      |
| ALA061  | A     | 0      | ALA061  | B     | 0      | ALA061  | C     | 0      |
| VAL062  | A     | 0      | VAL062  | B     | 0      | VAL062  | C     | 0      |
| ARG063  | A     | 1      | ARG063  | B     | 1      | ARG063  | C     | 1      |
| GLU064  | A     | -1     | GLU064  | B     | -1     | GLU064  | C     | -1     |
| LEU065  | A     | 0      | LEU065  | B     | 0      | LEU065  | C     | 0      |
| SER066  | A     | 0      | SER066  | B     | 0      | SER066  | C     | 0      |
| GLY067  | A     | 0      | GLY067  | B     | 0      | GLY067  | C     | 0      |
| TRP068  | A     | 0      | TRP068  | B     | 0      | TRP068  | C     | 0      |
| GLN069  | A     | 0      | GLN069  | B     | 0      | GLN069  | C     | 0      |
| TYR070  | A     | 0      | TYR070  | B     | 0      | TYR070  | C     | 0      |
| VAL071  | A     | 0      | VAL071  | B     | 0      | VAL071  | C     | 0      |
| PRO072  | A     | 0      | PRO072  | B     | 0      | PRO072  | C     | 0      |
| VAL073  | A     | 0      | VAL073  | B     | 0      | VAL073  | C     | 0      |
| THR074  | A     | 0      | THR074  | B     | 0      | THR074  | C     | 0      |
| CYS075  | A     | 0      | CYS075  | B     | 0      | CYS075  | C     | 0      |
| MET076  | A     | 0      | MET076  | B     | 0      | MET076  | C     | 0      |
| GLN077  | A     | 0      | GLN077  | B     | 0      | GLN077  | C     | 0      |
| GLU078  | A     | -1     | GLU078  | B     | -1     | GLU078  | C     | -1     |
| MET079  | A     | 0      | MET079  | B     | 0      | MET079  | C     | 0      |
| ASP080  | A     | -1     | ASP080  | B     | -1     | ASP080  | C     | -1     |
| VAL081  | A     | 0      | VAL081  | B     | 0      | VAL081  | C     | 0      |
| THR082  | A     | 0      | THR082  | B     | 0      | THR082  | C     | 0      |
| GLY083  | A     | 0      | GLY083  | B     | 0      | GLY083  | C     | 0      |
| GLY084  | A     | 0      | GLY084  | B     | 0      | GLY084  | C     | 0      |
| LEU085  | A     | 0      | LEU085  | B     | 0      | LEU085  | C     | 0      |
| LYS086  | A     | 1      | LYS086  | B     | 1      | LYS086  | C     | 1      |
| LYS087  | A     | 1      | LYS087  | B     | 1      | LYS087  | C     | 1      |
| CYS088  | A     | 0      | CYS088  | B     | 0      | CYS088  | C     | 0      |
| ILE089  | A     | 0      | ILE089  | B     | 0      | ILE089  | C     | 0      |
| ARG090  | A     | 1      | ARG090  | B     | 1      | ARG090  | C     | 1      |
| VAL091  | A     | 0      | VAL091  | B     | 0      | VAL091  | C     | 0      |
| MET092  | A     | 0      | MET092  | B     | 0      | MET092  | C     | 0      |
| MET093  | A     | 0      | MET093  | B     | 0      | MET093  | C     | 0      |

Continued on next page

**Table S1 – continued from previous page**

| Residue | Chain | Charge | Residue | Chain | Charge | Residue | Chain | Charge |
|---------|-------|--------|---------|-------|--------|---------|-------|--------|
| THR094  | A     | 0      | THR094  | B     | 0      | THR094  | C     | 0      |
| VAL095  | A     | 0      | VAL095  | B     | 0      | VAL095  | C     | 0      |
| GLN096  | A     | 0      | GLN096  | B     | 0      | GLN096  | C     | 0      |
| THR097  | A     | 0      | THR097  | B     | 0      | THR097  | C     | 0      |
| ASP098  | A     | -1     | ASP098  | B     | -1     | ASP098  | C     | -1     |
| VAL099  | A     | 0      | VAL099  | B     | 0      | VAL099  | C     | 0      |
| PRO100  | A     | 0      | PRO100  | B     | 0      | PRO100  | C     | 0      |
| GLN101  | A     | 0      | GLN101  | B     | 0      | GLN101  | C     | 0      |
| ASP102  | A     | -1     | ASP102  | B     | -1     | ASP102  | C     | -1     |
| GLN103  | A     | 0      | GLN103  | B     | 0      | GLN103  | C     | 0      |
| ILE104  | A     | 0      | ILE104  | B     | 0      | ILE104  | C     | 0      |
| ARG105  | A     | 1      | ARG105  | B     | 1      | ARG105  | C     | 1      |
| HIS106  | A     | 0      | HIS106  | B     | 0      | HIS106  | C     | 0      |
| VAL107  | A     | 0      | VAL107  | B     | 0      | VAL107  | C     | 0      |
| TYR108  | A     | 0      | TYR108  | B     | 0      | TYR108  | C     | 0      |
| LEU109  | A     | 0      | LEU109  | B     | 0      | LEU109  | C     | 0      |
| GLU110  | A     | -1     | GLU110  | B     | -1     | GLU110  | C     | -1     |
| LYS111  | A     | 1      | LYS111  | B     | 1      | LYS111  | C     | 1      |
| ALA112  | A     | 0      | ALA112  | B     | 0      | ALA112  | C     | 0      |
| VAL113  | A     | 0      | VAL113  | B     | 0      | VAL113  | C     | 0      |
| VAL114  | A     | 0      | VAL114  | B     | 0      | VAL114  | C     | 0      |
| LEU115  | A     | -1     | LEU115  | B     | 0      | LEU115  | C     | 0      |
|         |       |        | ARG116  | B     | 1      | ARG116  | C     | 1      |
|         |       |        | PRO117  | B     | 0      | PRO117  | C     | 0      |
|         |       |        | ASP118  | B     | -1     | ASP118  | C     | -2     |
|         |       |        | LEU119  | B     | -1     |         |       |        |
