# Supplementary material
Source: publisher figshare collection journal article supplement (https://plos.figshare.com/articles/dataset/_/681126)
Supplement: Supplementary file [file 1]

**Table S4.**

|                | $R_R$ | $R_{TS}$ | $R_P$ | $E_{TS-R}$ | $E_{P-R}$ |
|----------------|-------|----------|-------|------------|-----------|
| MP2/6-31G(d)   | -1.83 | -0.11    | 1.57  | 22.15      | -5.69     |
| MP2/cc-pVDZ    | -1.83 | -0.35    | 1.57  | 19.92      | -7.97     |
| B3LYP/6-31G(d) | -1.83 | 0.13     | 1.57  | 24.90      | 1.35      |
| B3LYP/cc-pVDZ  | -1.83 | 0.13     | 1.57  | 23.50      | 0.12      |

The reaction coordinates in Å for the reactant, transition state and product are  $R_R$ ,  $R_{TS}$  and  $R_P$ , respectively. The barrier height of the transition state  $E_{TS-R}$  and the overall reaction energy  $E_{P-R}$  are in kcal/mol.
